# Supplementary material for: Mitochondrial Fission Governed by Drp1 Regulates Exogenous Fatty Acid Usage and Storage in Hela Cells
Source: Metabolites. 2021 May 18;11(5):322. doi: 10.3390/metabo11050322 (PMC8157282; doi:10.3390/metabo11050322)
Supplement: Supplementary file 1 [file metabolites-11-00322-s001.zip]

Archive with 7 entries (7 files):
- FigS1.tif
- FigS2.tif
- FigS3.tif
- FigS4.tif
- FigS5.tif
- FigS6.tif
- Supplemental Figure legends.pdf
